# Supplementary material for: ZIF-8-on-MIL-68(Ga) Derived S-scheme Heterojunction for Photocatalytic Reduction CO2 to CH4 in Pure Water
Source: Research Square preprint supplement (doi:10.21203/rs.3.rs-4542898/v1), 2024-06-20
Supplement: Supplementary file 1 [file 35fff99f759d11e8af3074ed.docx]

**Supporting Information for:**

**ZIF-8-on-MIL-68(Ga) Derived S-scheme Heterojunction for Photocatalytic Reduction CO2 to CH4 in Pure Water**

*Yu Ma#, a, Qingqing Jiang#,*, a, Hao Yu a, Qin Li a, Kangle Lv a, Juncheng Hu *, a , Ryan Richards *, b,c*

aKey Laboratory of Catalysis and Energy Materials Chemistry of Ministry of Education, School of Chemistry and Materials Science, South-Central Minzu University, Wuhan 430074, China

bDepartment of Chemistry, Colorado School of Mines, Golden, Colorado 80401, United States

cNational Renewable Energy Laboratory, 15523 Denver West Parkway, Golden, Colorado 80401, United States

# Yu Ma and Qingqing Jiang contributes equally to this work.

* Corresponding author: [qqjiang@mail.scuec.edu.cn](mailto:qqjiang@mail.scuec.edu.cn); [jchu@mail.scuec.edu.cn](mailto:jchu@mail.scuec.edu.cn); rrichard@mines.edu

**1. Experimental section**

**1.1. Materials and reagents:**

Gallium nitrate hydrate (Ga(NO3)3·xH2O), zinc nitrate hexahydrate (Zn(NO3)2·6H2O), and 2-methylimidazole were purchased from Aladdin Industrial Corporation. Terephthalic acid (H2BDC), hexadecyltrimethylammonium bromide (CTAB), N,N-Dimethylformamide (DMF), tetrachloroauric(Ⅲ) acid tetrahydrate (HAuCl4·4H2O), sodium bicarbonate (NaHCO3), ethanol, and methanol were provided by Sinopharm Chemical Reagent Co., Ltd. All chemicals were of analytical grade and used directly without further purification. Deionized water was used in all experiments.

**1.2. Synthesis of MIL-68(Ga):**

60 mg of Ga(NO3)3·xH2O and 60 mg of H2BDC were dissolved in 30 mL and 10 mL of DMF, which were termed as solution A and solution B respectively. Then solution B was poured into solution A with sonicating for 15 min. Afterward, the mixture was transferred into a 100 mL Teflon-lined stainless autoclave and maintained at a preheated oven at 120 ℃ for 24 h. After cooling down to room temperature, the precipitate was washed with ethanol three times and finally dried at 60 ℃ overnight.

**1.3. Synthesis of ZIF-8-on-MIL-68:**

Typically, certain amounts of MIL-68(Ga) (e.g., 50, 100 and 150 mg, respectively) were ultrasonically dispersed in 20 mL of methanol. 5 mg of CTAB and 165 mg of Zn(NO3)2·6H2O were added to the above solution and stirred for 1 h. Subsequently, 367.5 mg of 2-methylimidazole was dissolved in 10 mL of methanol and then added into the above mixture and stirred for 10 min. Afterward, the mixture was transferred into a 100mL Teflon-lined stainless autoclave and kept heating at 90 ℃ for 12h. After the solvothermal process, the precipitate was washed with ethanol several times and finally dried at 60 ℃ overnight. Products with different amounts of MIL-68 were labeled as ZM-50, ZM-100, ZM-150, respectively. In comparison, pure ZIF-8 was synthesized by the similar method.

**1.4. Synthesis of ZnGa2O4/ZnO:**

The ZnGa2O4/ZnO and ZnO were synthesized via calcination of the obtained ZM and ZIF-8 at 600 ℃ for 4 h in air with a heating rate of 3 ℃/min. The samples were named ZGO-50 (ZGO), ZGO-100, ZGO-150, ZnO, respectively.

**1.5. Synthesis of Au/ZnGa2O4/ZnO:**

50 mg of ZGO-50 (ZGO) was dispersed in 100 mL of H2O. Then a certain amount of HAuCl4 solution (0.01 g/mL) was added into the above suspension. After stirring for 30 min, 3 mL ice-cooled NaBH4 solution (0.1 M) was rapidly added into the mixture. Then, the mixture was stirred another 30 min. The obtained precipitation was repeatedly washed with deionized water and ethanol and dried at 60 °C overnight in a vacuum, which was denoted as ZGO/Au. A series of ZGO/Au-x samples with different Au loadings were prepared: x = 0.1, 0.25, 0.5, 0.75, and 1 wt. %.

**2. Characterizations**

Powder X-ray diffraction (XRD) characterizations of the samples were carried out on a Bruker D8 Advance using Cu Kα radiation (λ = 1.5404 Å, Germany). The morphologies of the samples were observed by SU8010 field-emission scanning electron microscope (FESEM, Hitachi, Japan) at a decelerating voltage of 2 kV. The transmission electron microscope (TEM), high-resolution transmission electron microscope (HRTEM), and energy-dispersive X-ray spectroscopy (EDX) were measured on a Thermo Fisher Talos F200X transmission electron microscope operated at 200 kV. Both the X-ray photoelectron spectroscopy (XPS) and valence-band X-ray photoelectron spectroscopy (VB-XPS) were determined by VG Multi lab 2000. The ultraviolet photoelectron spectra (UPS) was performed with the bias of -10 V. The UV-Vis diffused reflectance spectra (DRS) were recorded between 200 and 800 nm on the Cary-5000 spectrophotometer (Agilent) with BaSO4 plate as reference substance. Photoluminescence (PL) measurements were characterized on a Hitachi F-7000 with an excitation wavelength of 255 nm. N2 adsorption/desorption was measured on an ASAP 2020 PLUS adsorption analyzer (Micromeritics, USA) to obtain the Brunauer-Emmett Teller (BET) surface area and the pore size distribution.

**3. Photoelectrochemical Measurements**

All the photoelectrochemical measurements were carried out on a CHI-760E electrochemical workstation (Shenzhen LAMPLIC Science Co. Ltd. China), using a typical three-electrode system, where Pt flake and Ag/AgCl were used as the counter and reference electrode, respectively. The working electrode was prepared as follows: 10 mg of catalyst was dispersed in a mixture containing 970 µL ethanol and 30 µL Nafion. The mixture was uniformly mixed by ultrasonication and then dropped on an ITO glass (1cm × 1 cm). The transient photocurrent was measured using a 3 W LED as the light source (λ ≥ 365 nm) in a 0.5 M Na2SO4 aqueous solution as the electrolyte. Electrochemical impedance spectroscopy (EIS) was measure over frequencies ranging from 1 Hz to 105 Hz with the initial potential 1.6V.

**4. Photocatalytic activity measurements**

Photocatalyst activity was tested by photocatalytic CO2 reduction in porphyry glassware. First, 25 mg of photocatalyst was placed in a Petri dish (Φ = 60 mm). Second, a certain amount of water was added to the Petri dish, and the photocatalyst was dispersed in the water by ultrasonication. It was transferred to a vacuum drying oven and dried overnight to form a uniformly dispersed film and placed in the reactor. Then, 1.2 g of NaHCO3 was added to the glassware. It was sealed and vacuumed (repeated two or three times). Next, 5 ml of H2SO4 solution (2M) was injected into the reactor to reacted with NaHCO3 to produce CO2 and water vapor in the system. A Xe lamp (Perfect-light) was used as simulate sunlight to drive the CO2 reduction, and after 1 h of irradiation, 1.0 mL of gas was taken and syringed into a gas chromatograph (GC-2014, Shimazu, Osaka, Japan) for product analysis. Circulating water was passed during the photocatalytic process to mitigate the effects of heat from light. The product selectivity of the reaction products is calculated as follows:

where v(CO) and v(CH4) are the production rates of CO and CH4, respectively.

**5. Computational detail**

DFT calculations were conducted through the Vienna ab initio Simulation Package (VASP) with the projector augment wave method.[1] Generalized gradient approximation of the Perdew-Burke-Ernzerhof (PBE) functional was used as the exchange-correlation functional.[2] The Brillouin zone was sampled with 2 × 2 × 1 K points for surface calculation. The cutoff energy was set as 500 eV, and structure relaxation was performed until the convergence criteria of energy and force reached 1 × 10–5 eV and 0.02 eV Å–1, respectively. A vacuum layer of 15 Å was constructed to eliminate interactions between periodic structures of surface models. The van der Waals (vdW) interaction was amended by the zero damping DFT-D3 method of Grimme.[3]

The adsorption energy (ΔEads) of adsorbate adsorption on surface is defined as

ΔEads = E(*adsorbate) − E(*) − E(adsorbate)

where E(*adsorbate) and E(*) are the total energy of surface systems with and without adsorbate, respectively, E(adsorbate) is the energy of an isolated adsorbate. According to this definition, negative adsorption energy suggests that the adsorption process is exothermic and the adsorption system is thermodynamically stable. Contrarily, a positive value corresponds to an endothermic and unstable adsorption.

The Gibbs free energy was calculated as ΔG = ΔE + ΔEZPE −TΔS, where the ΔE, ΔEZPE, and ΔS are electronic energy, zero-point energy, and entropy difference between products and reactants. The zero-point energies of isolated and absorbed intermediate products were calculated from the frequency analysis.[4] The vibrational frequencies and entropies of molecules in the gas phase were obtained from the National Institute of Standards and Technology (NIST) database.[5]


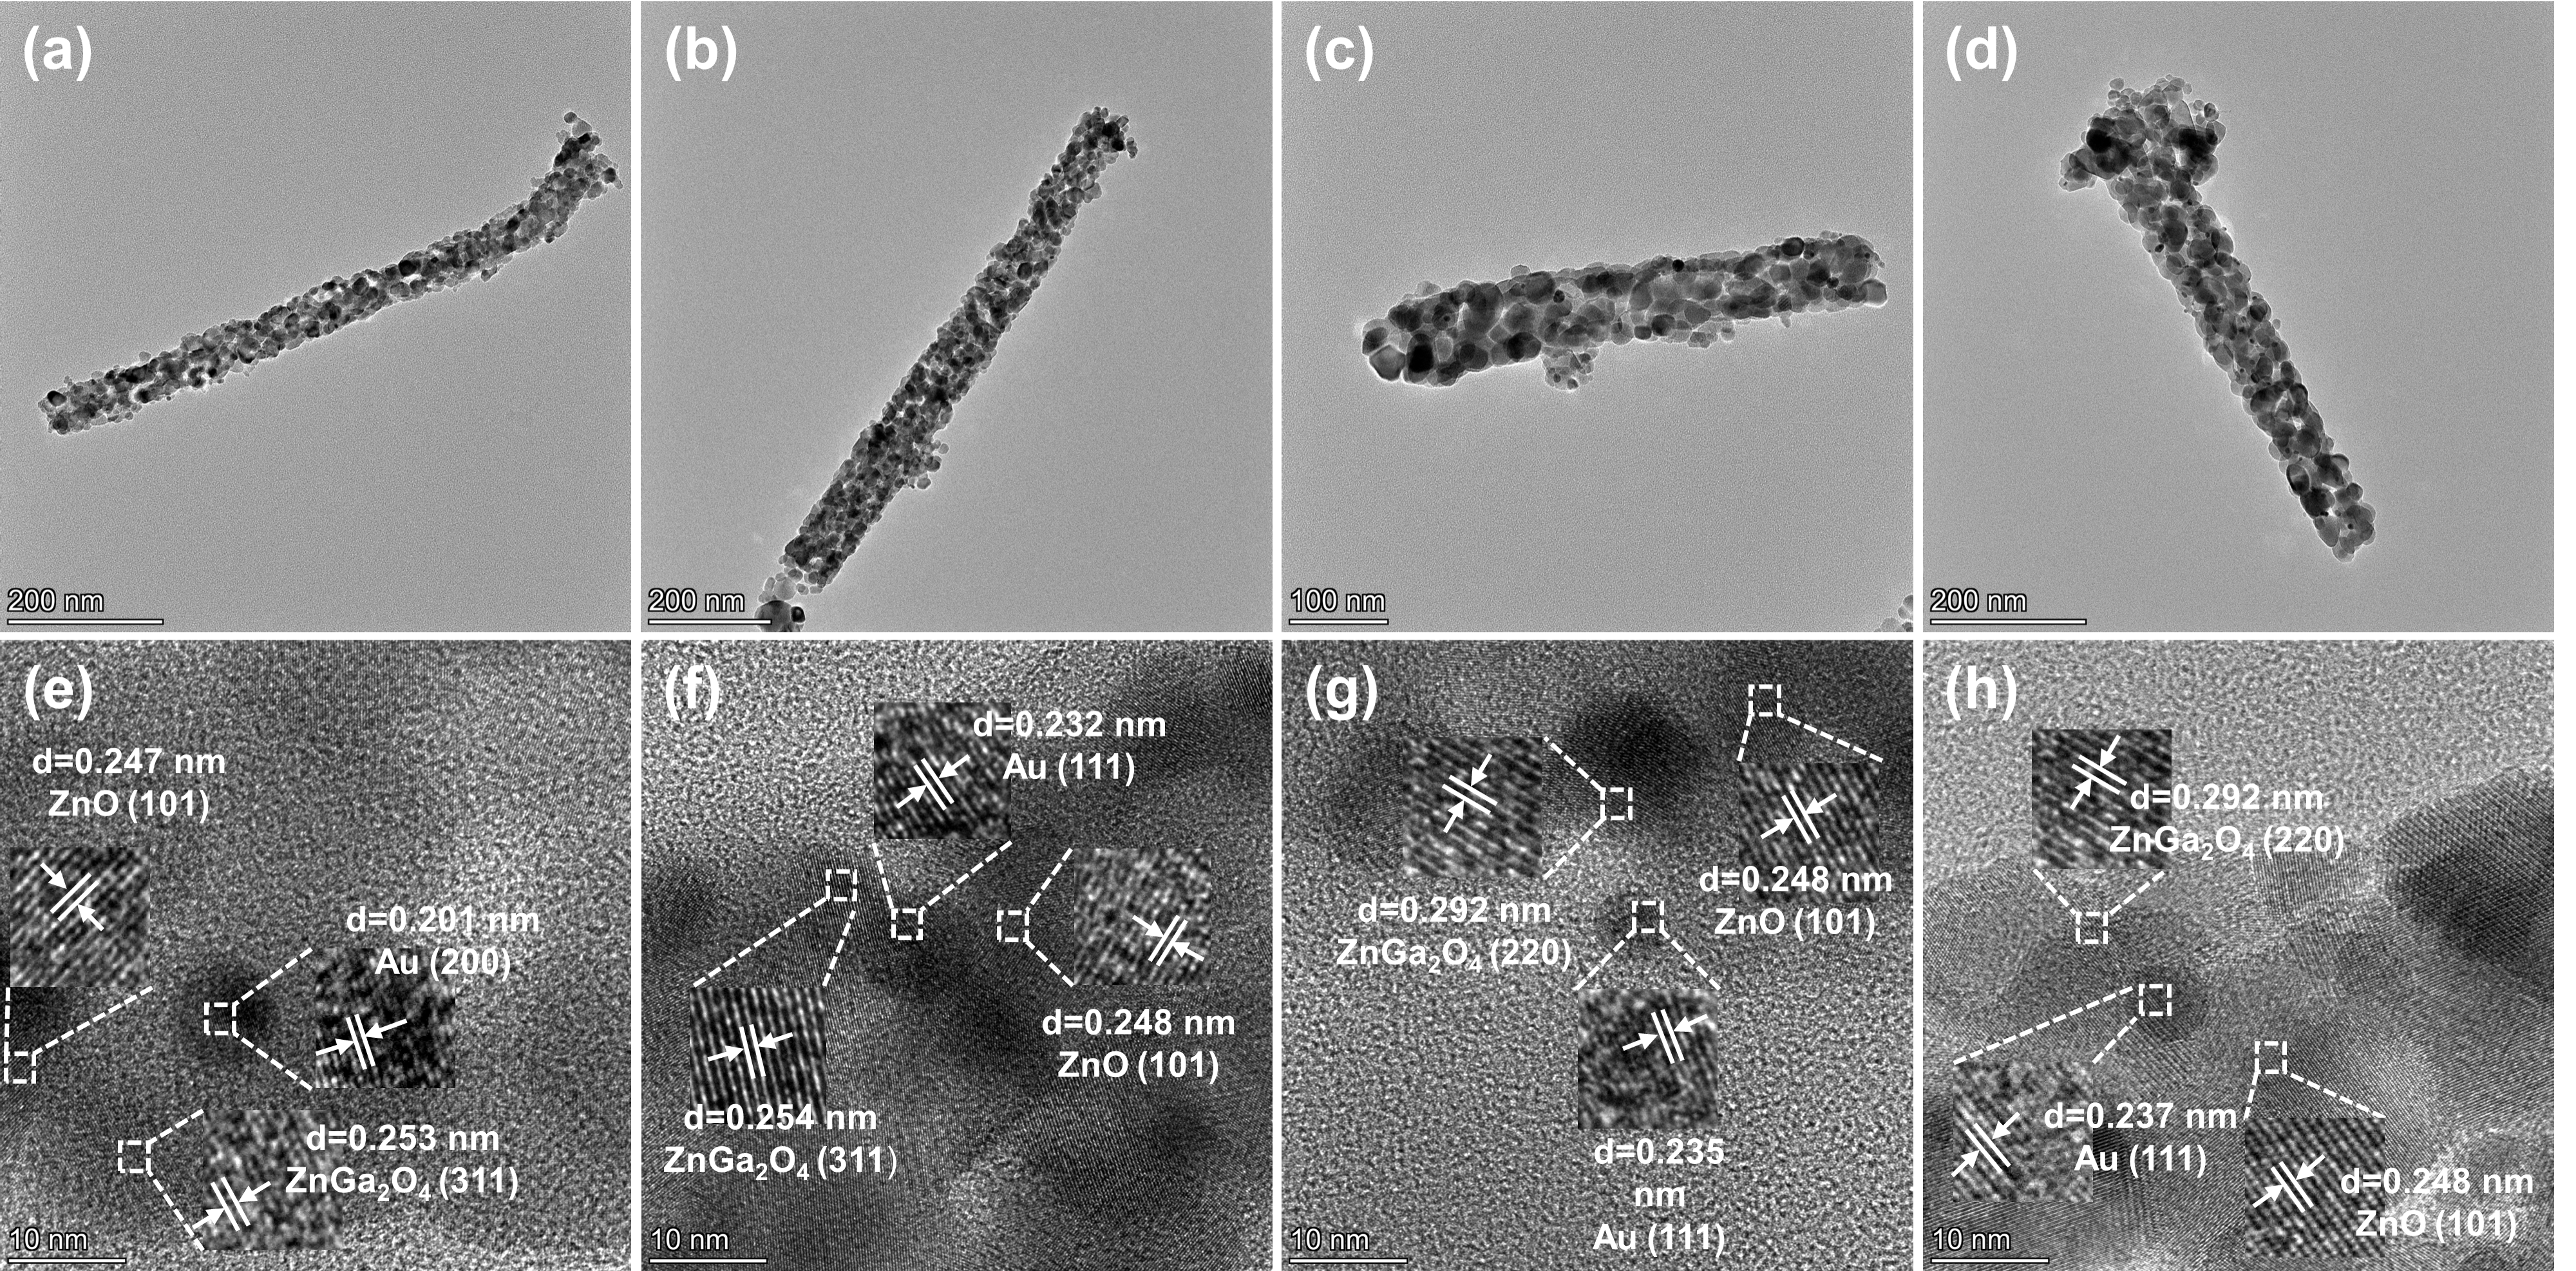


**Figure S1.** TEM images of (a) ZGO/Au-0.1, (b) ZGO/Au-0.25, (c) ZGO/Au-0.75, and (d) ZGO/Au-1.0. HRTEM images of (e) ZGO/Au-0.1, (f) ZGO/Au-0.25, (g) ZGO/Au-0.75, and (h) ZGO/Au-1.0.


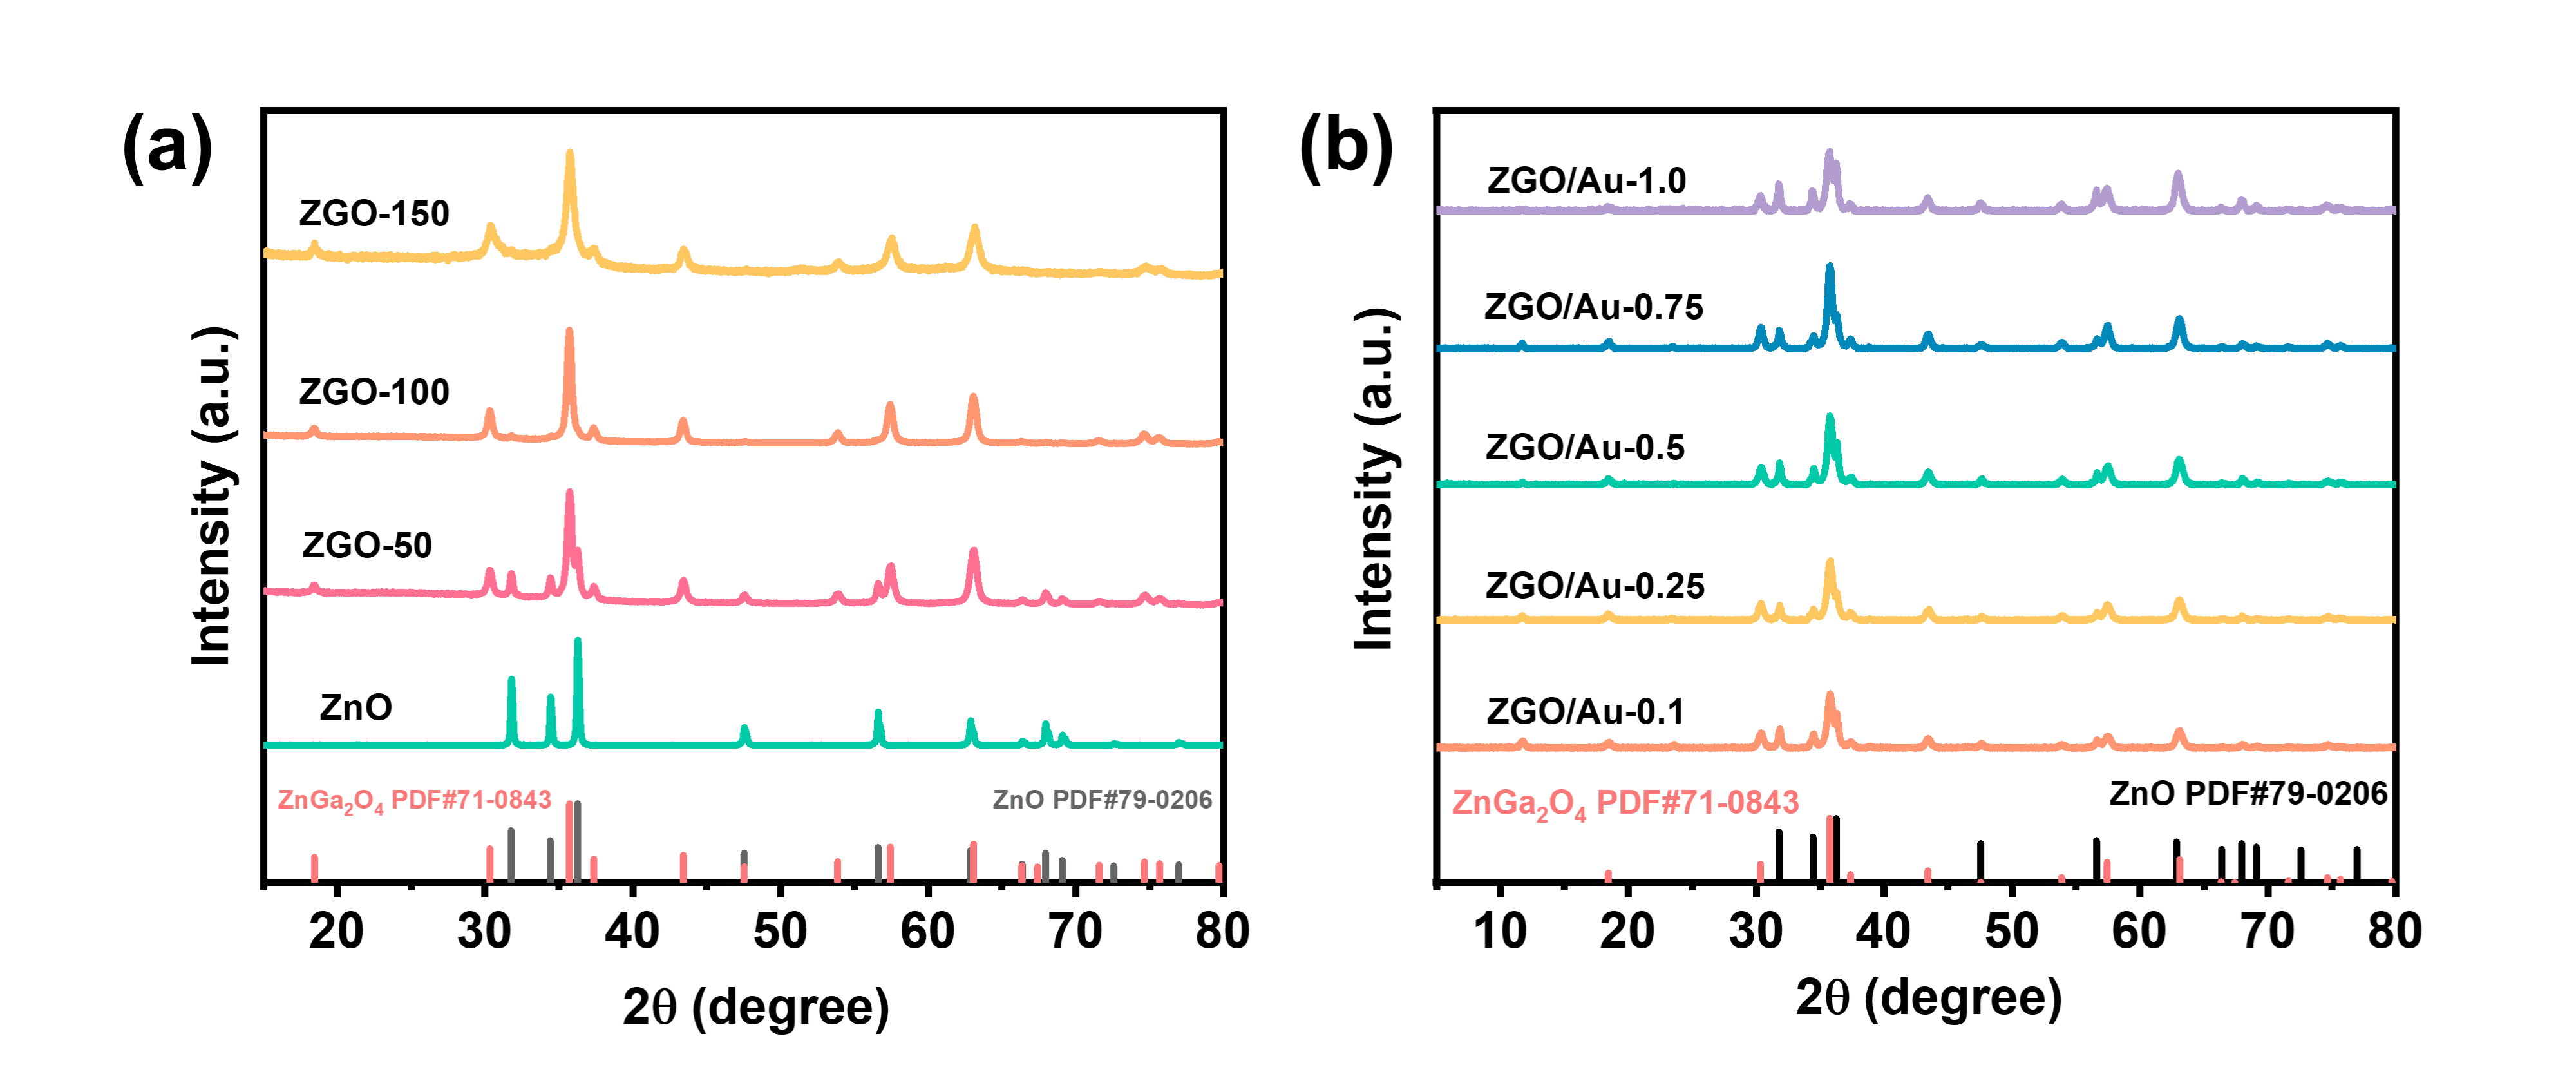


**Figure S2.** XRD patterns of (a) ZnO and ZGO, and (b) ZGO/Au.


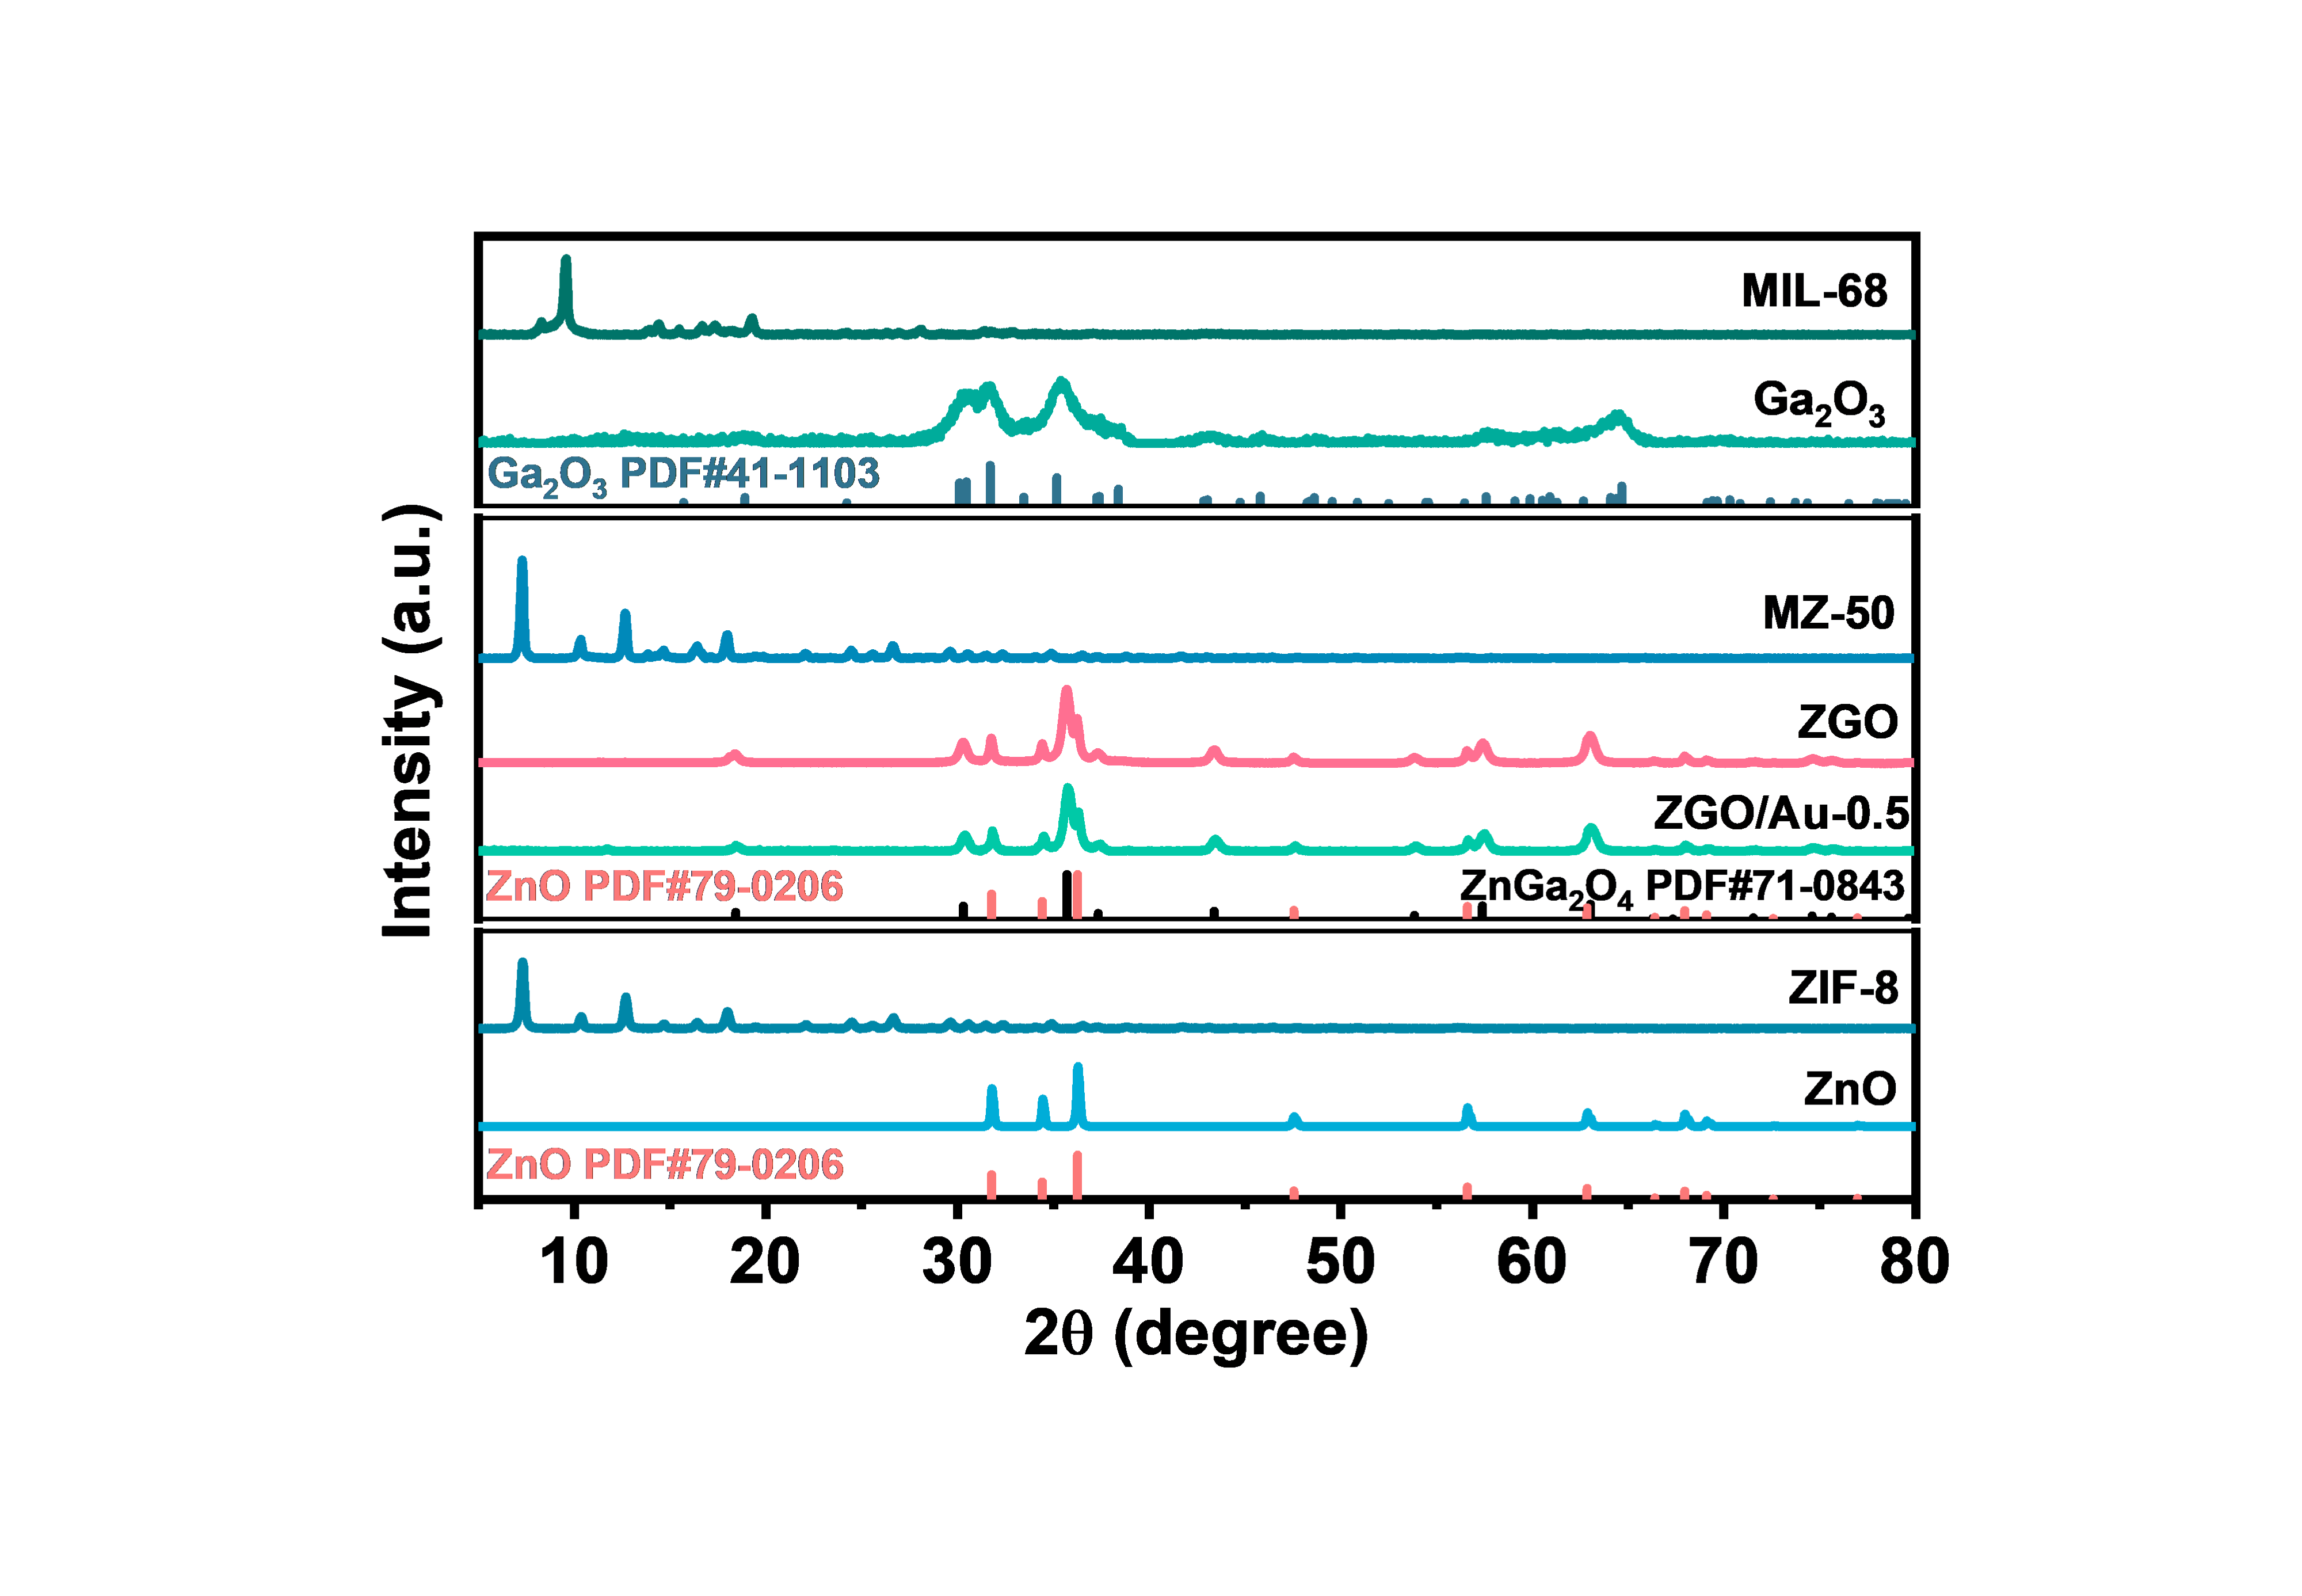


**Figure S3.** XRD patterns of all the as-prepared samples.


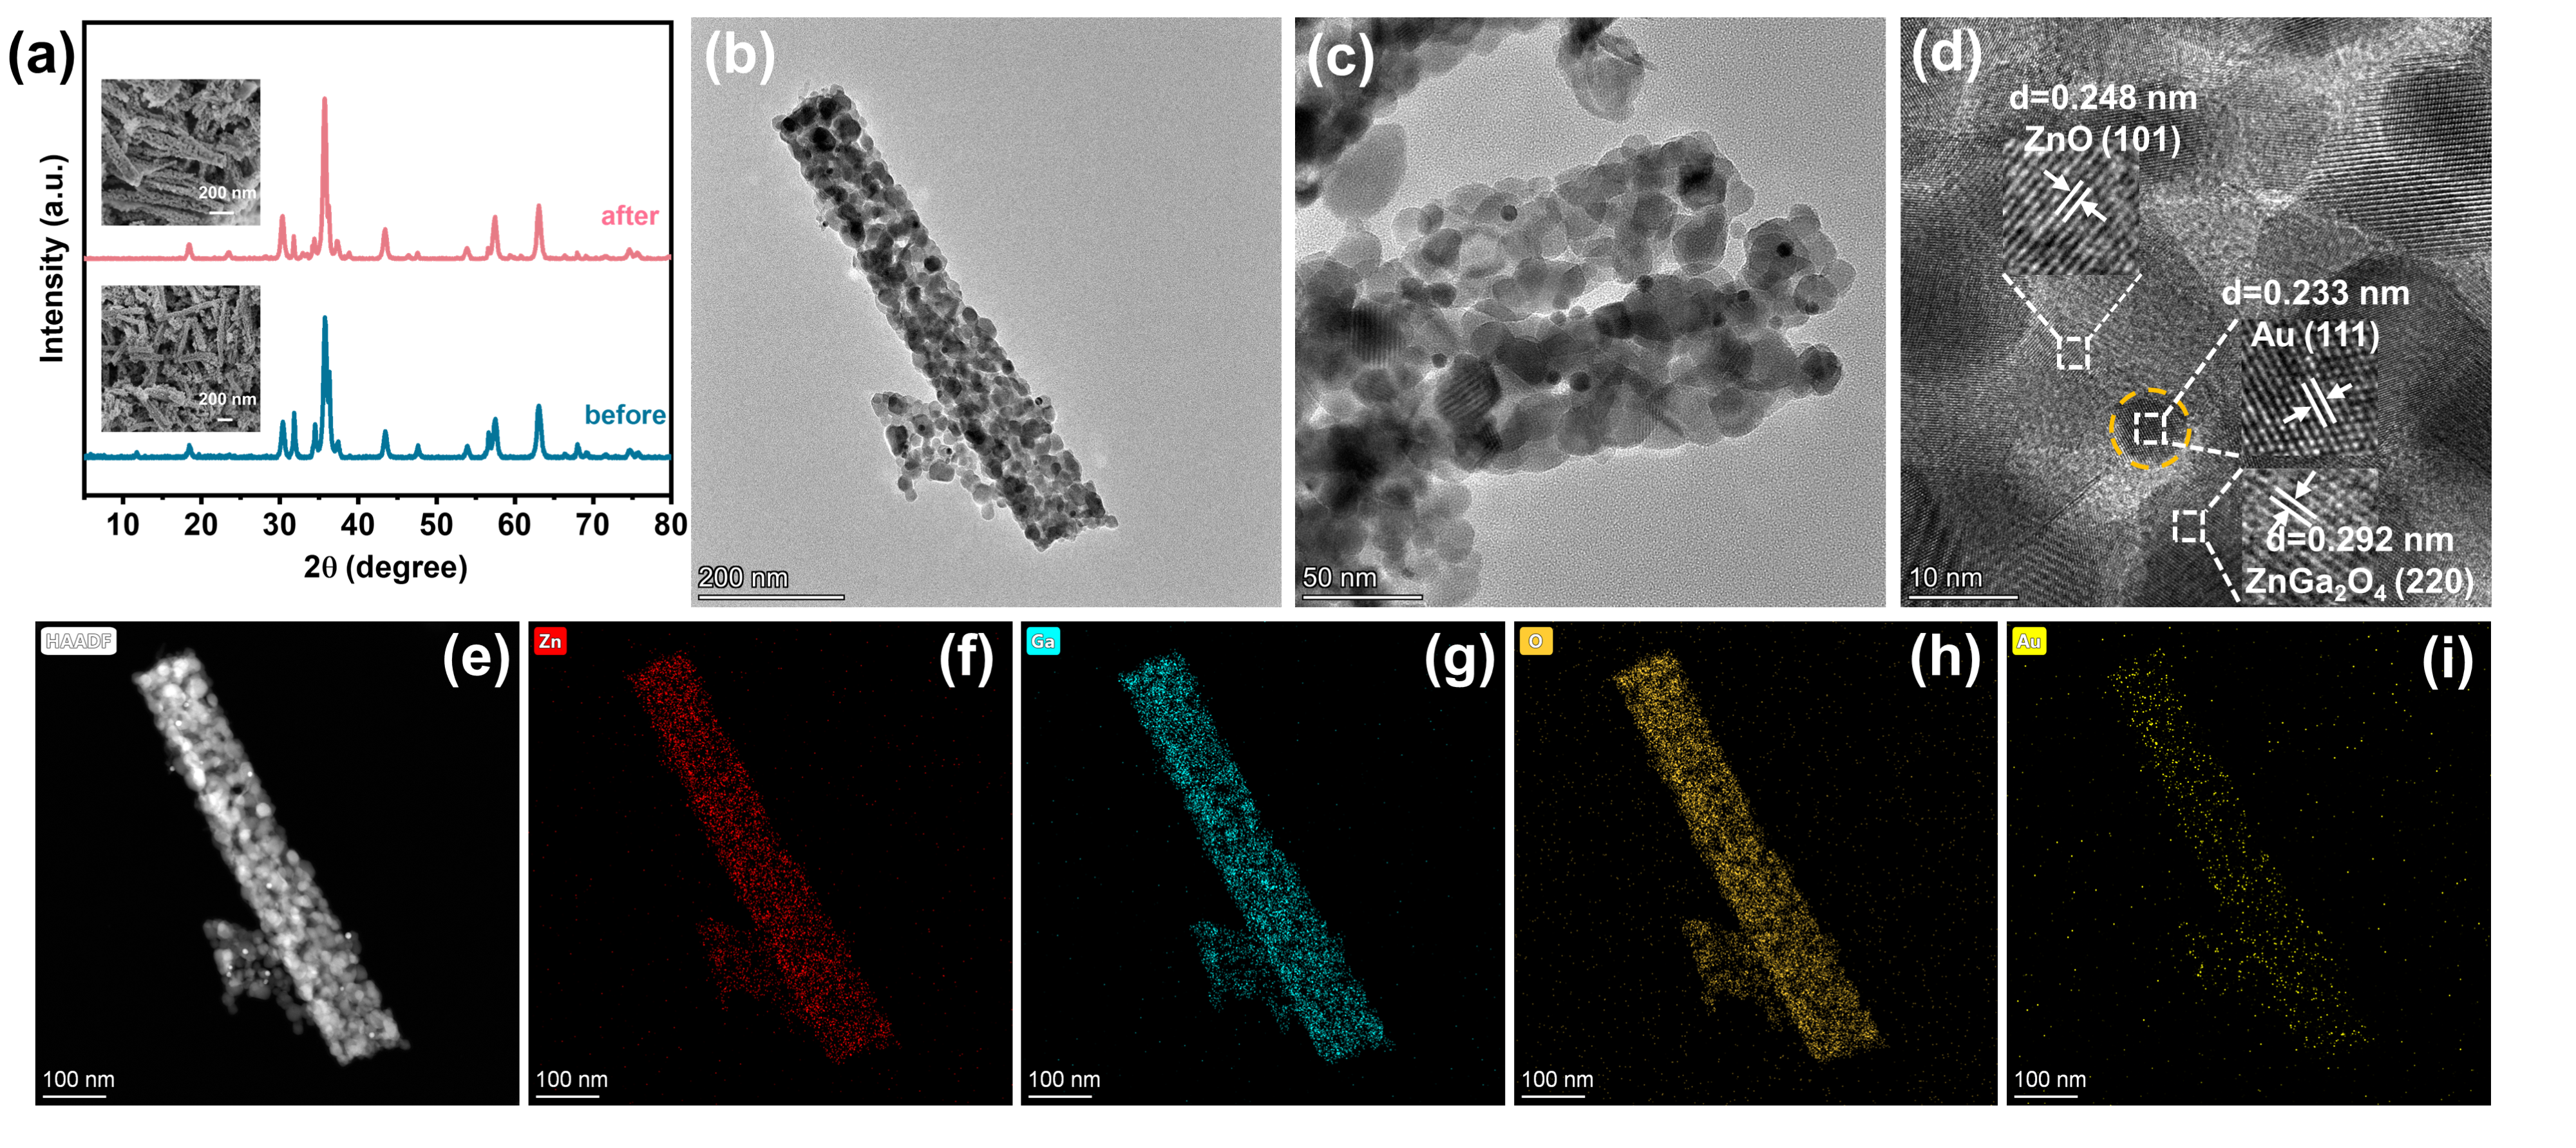


**Figure S4.** (a) XRD patterns and SEM images of ZGO/Au-0.5 before and after cycling test. (b-c) TEM, (d) HRTEM, and (e-i) EDS images of ZGO/Au-0.5 after cycling test.


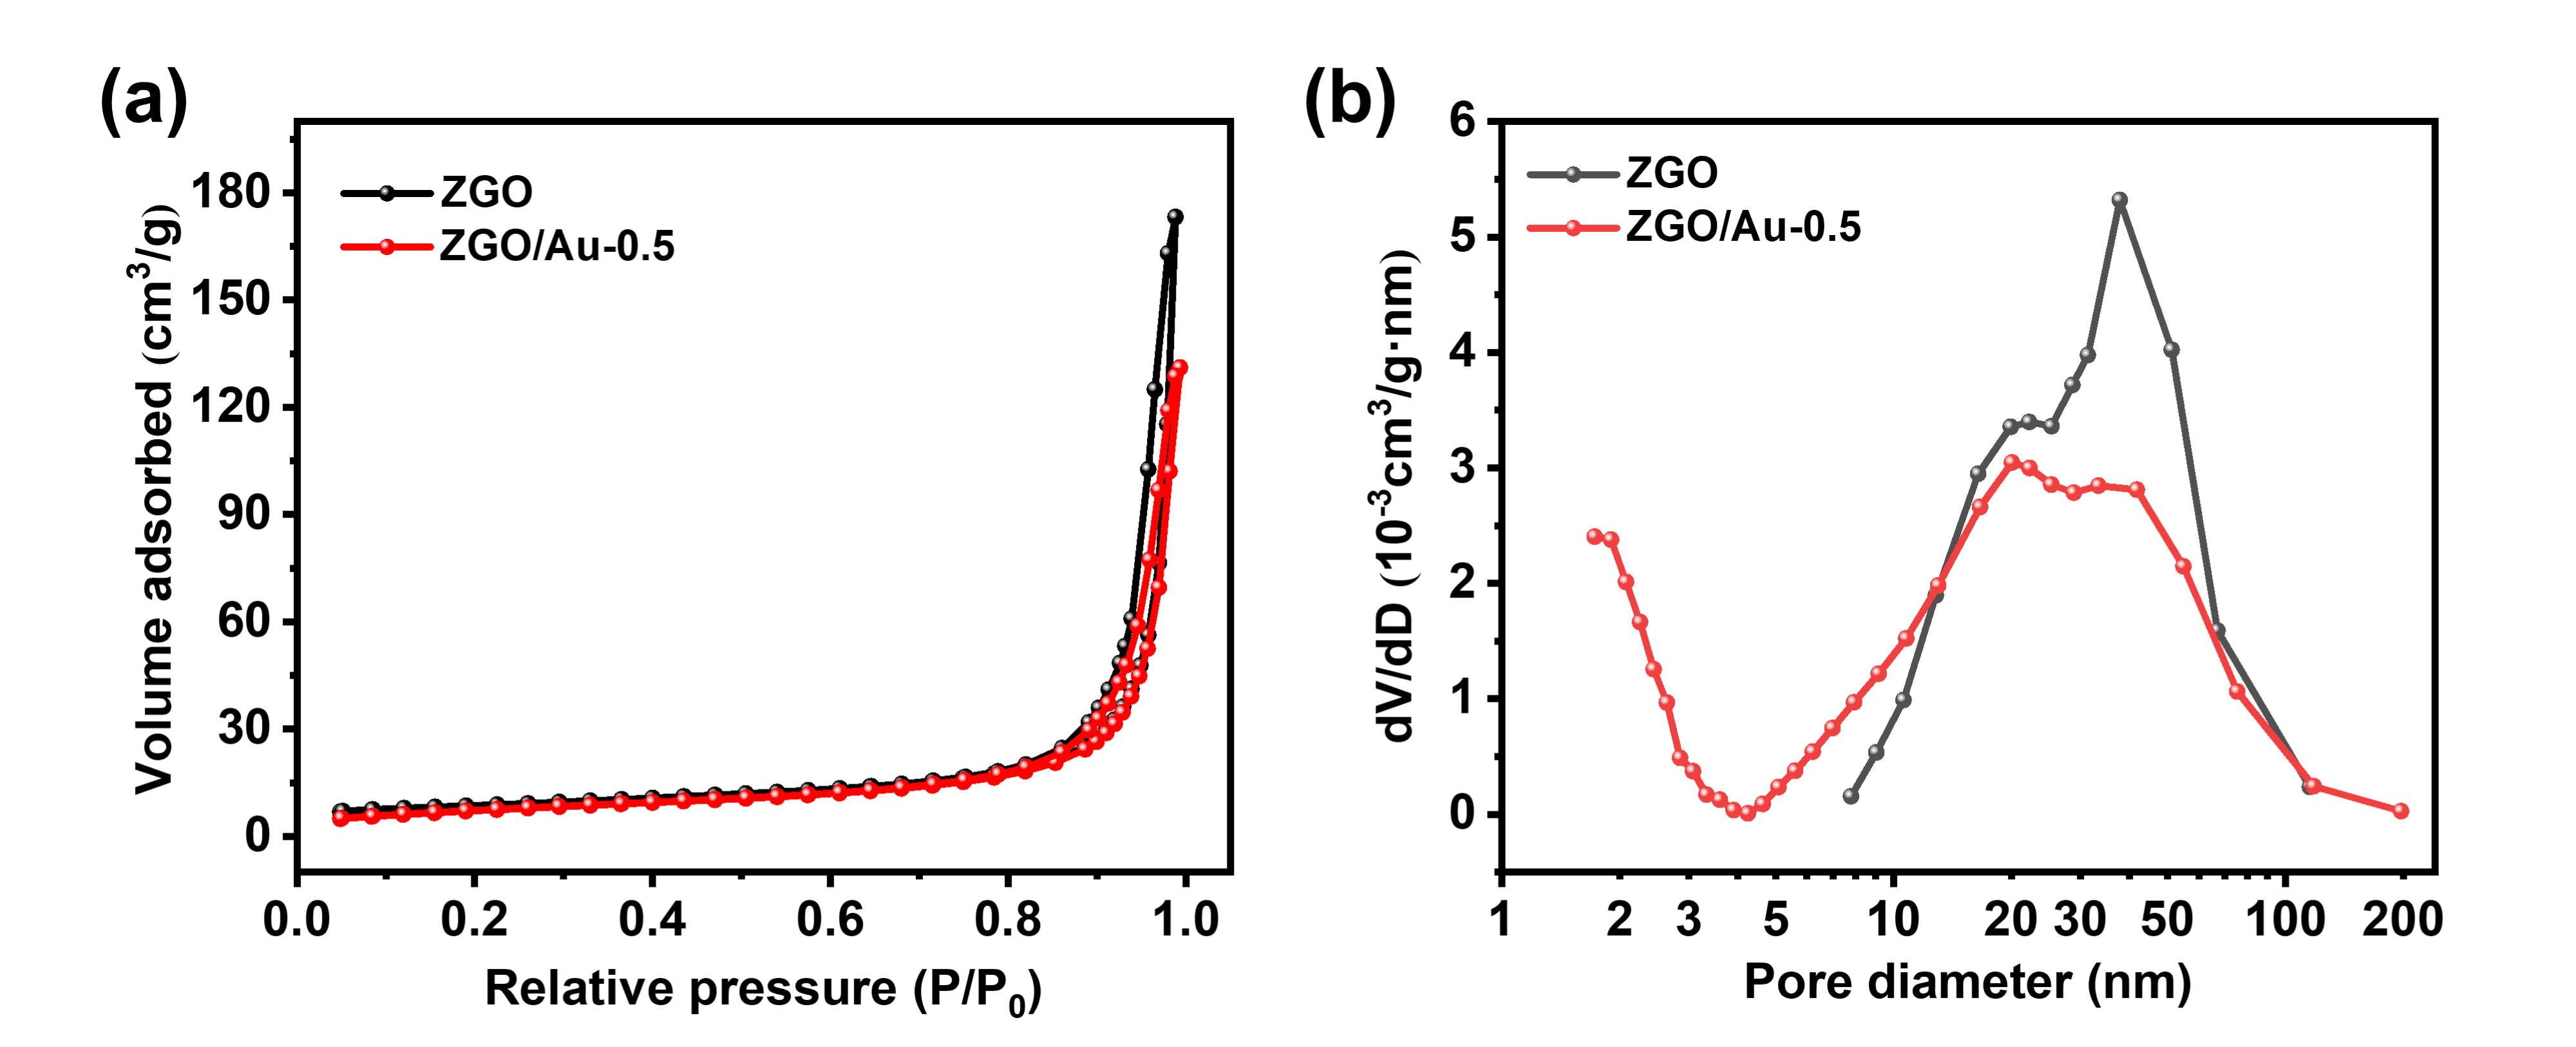


**Figure S5.** (a) N2 adsorption-desorption isotherm curves, and (b) pore diameter distribution curves of ZGO and ZGO/Au-0.5.


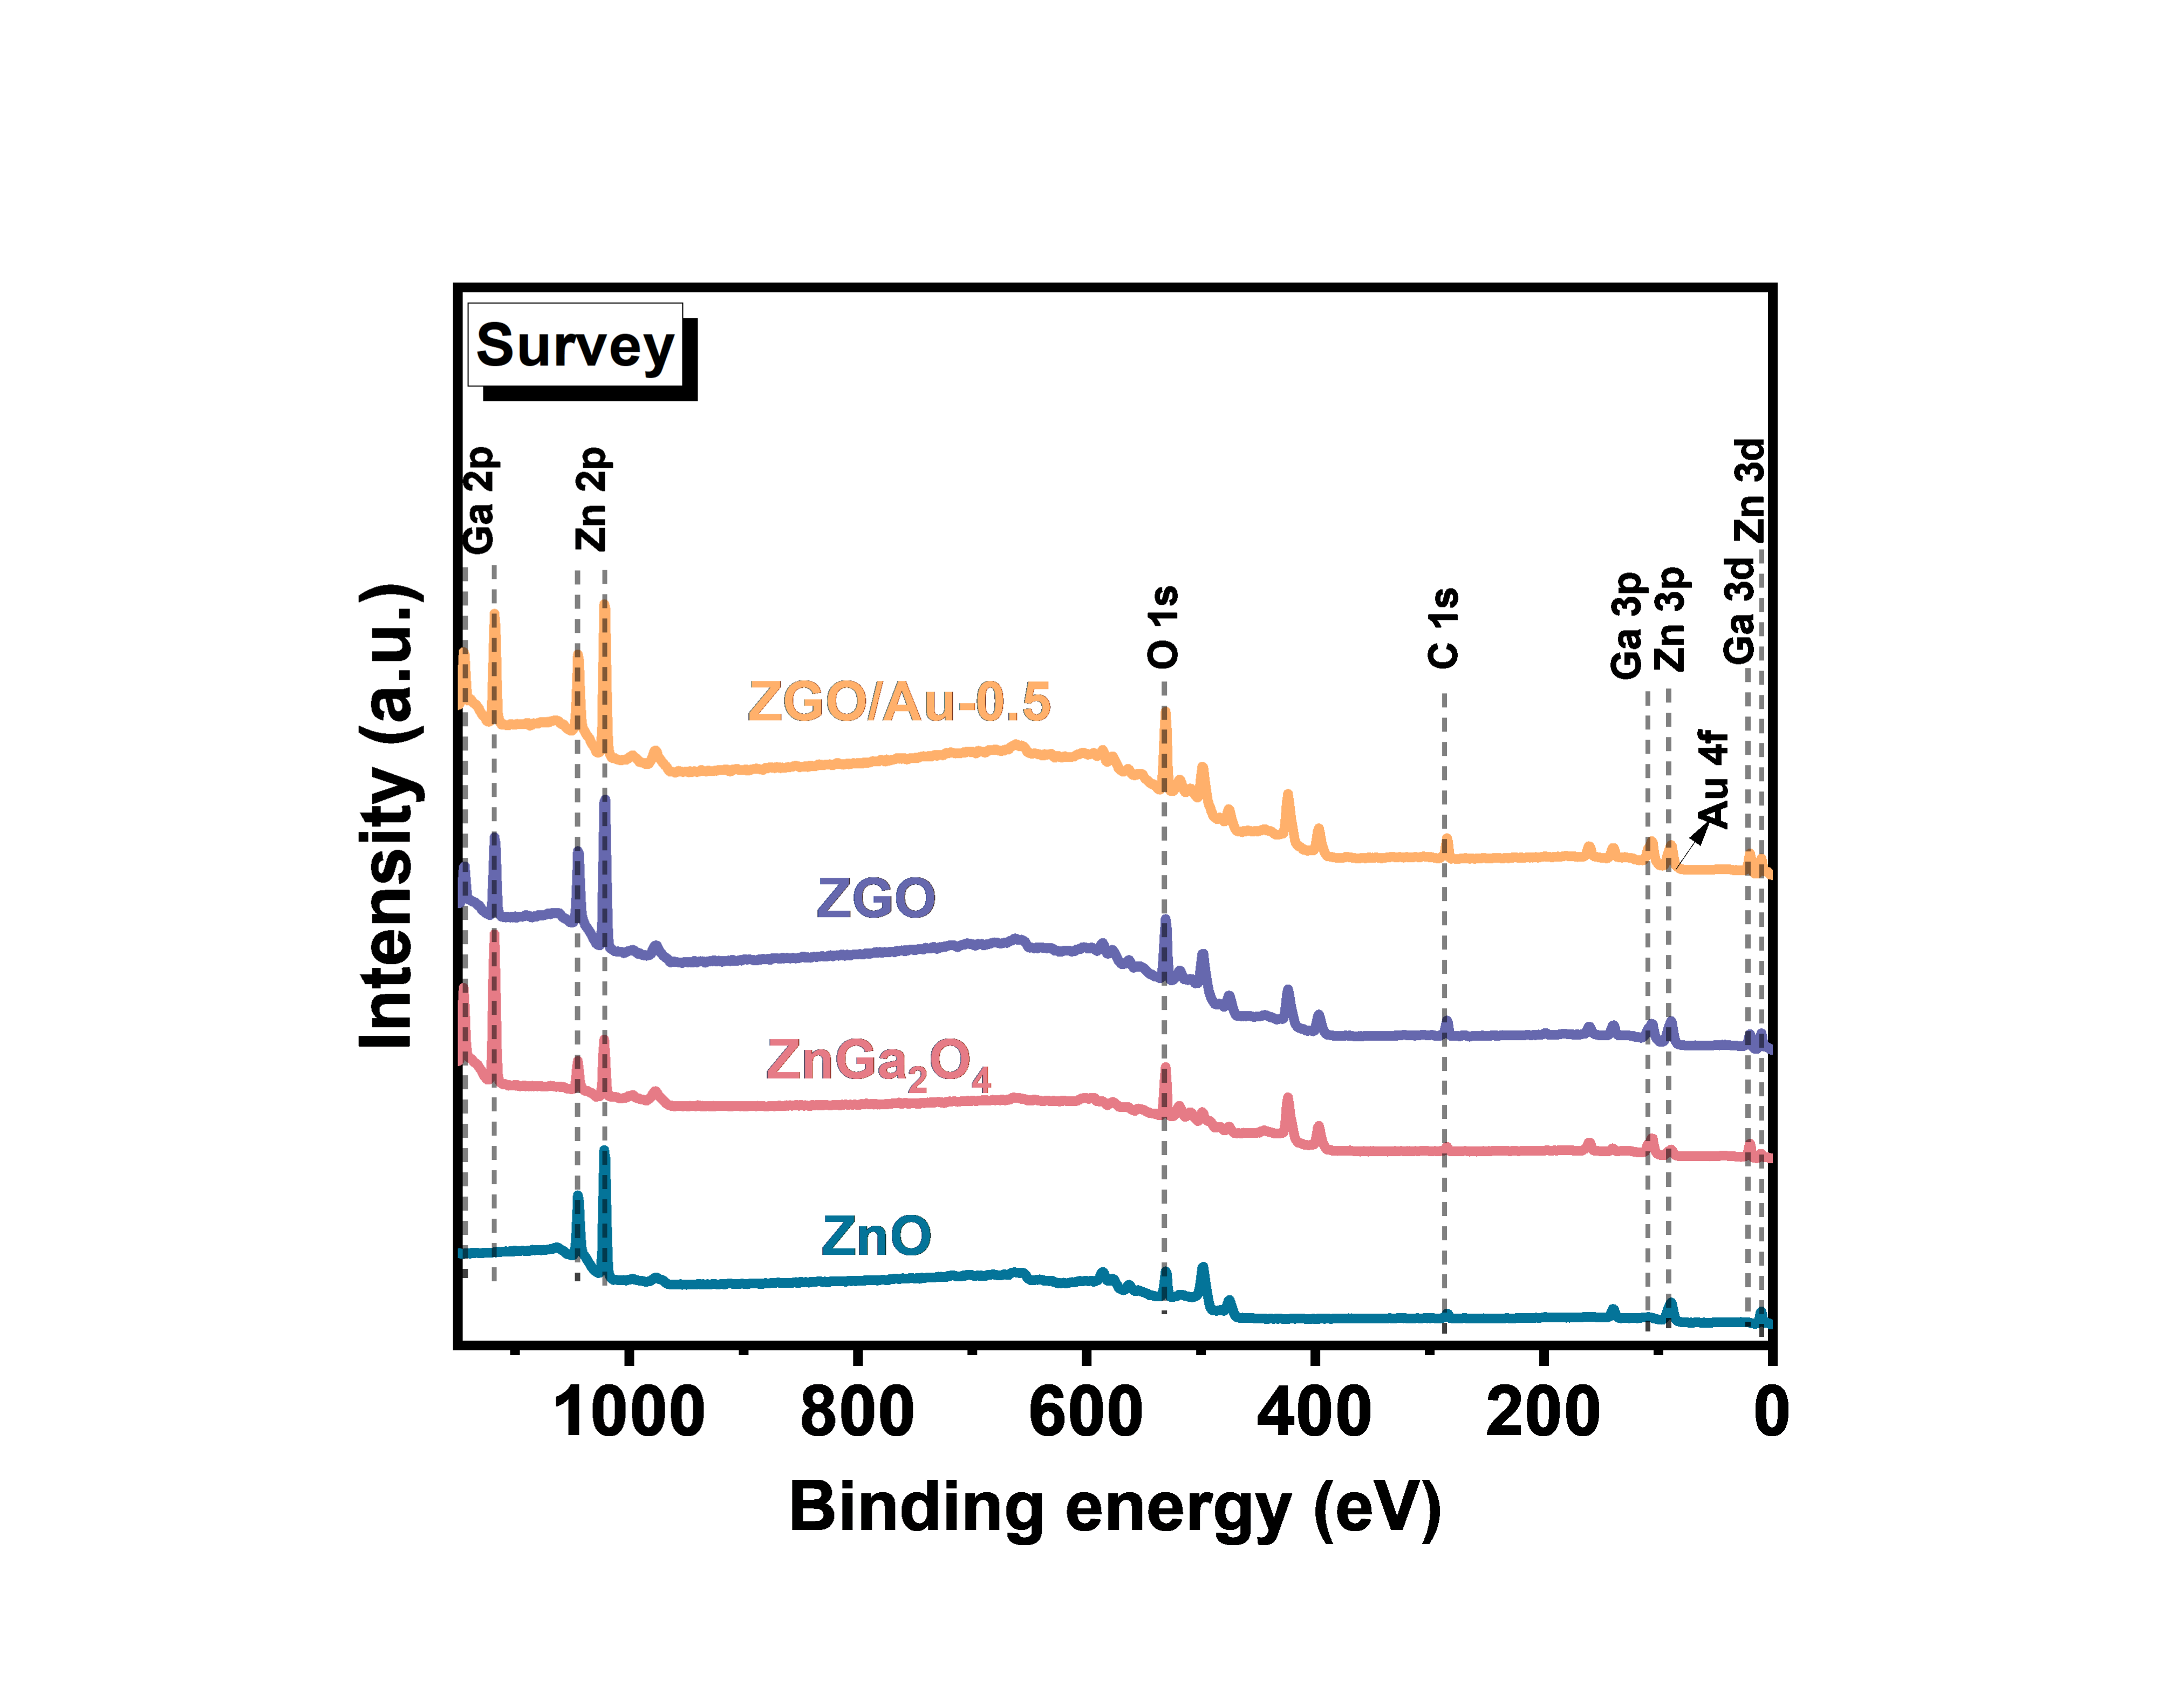


**Figure S6.** XPS survey spectra of ZnO, ZnGa2O4, ZGO, and ZGO/Au-0.5.


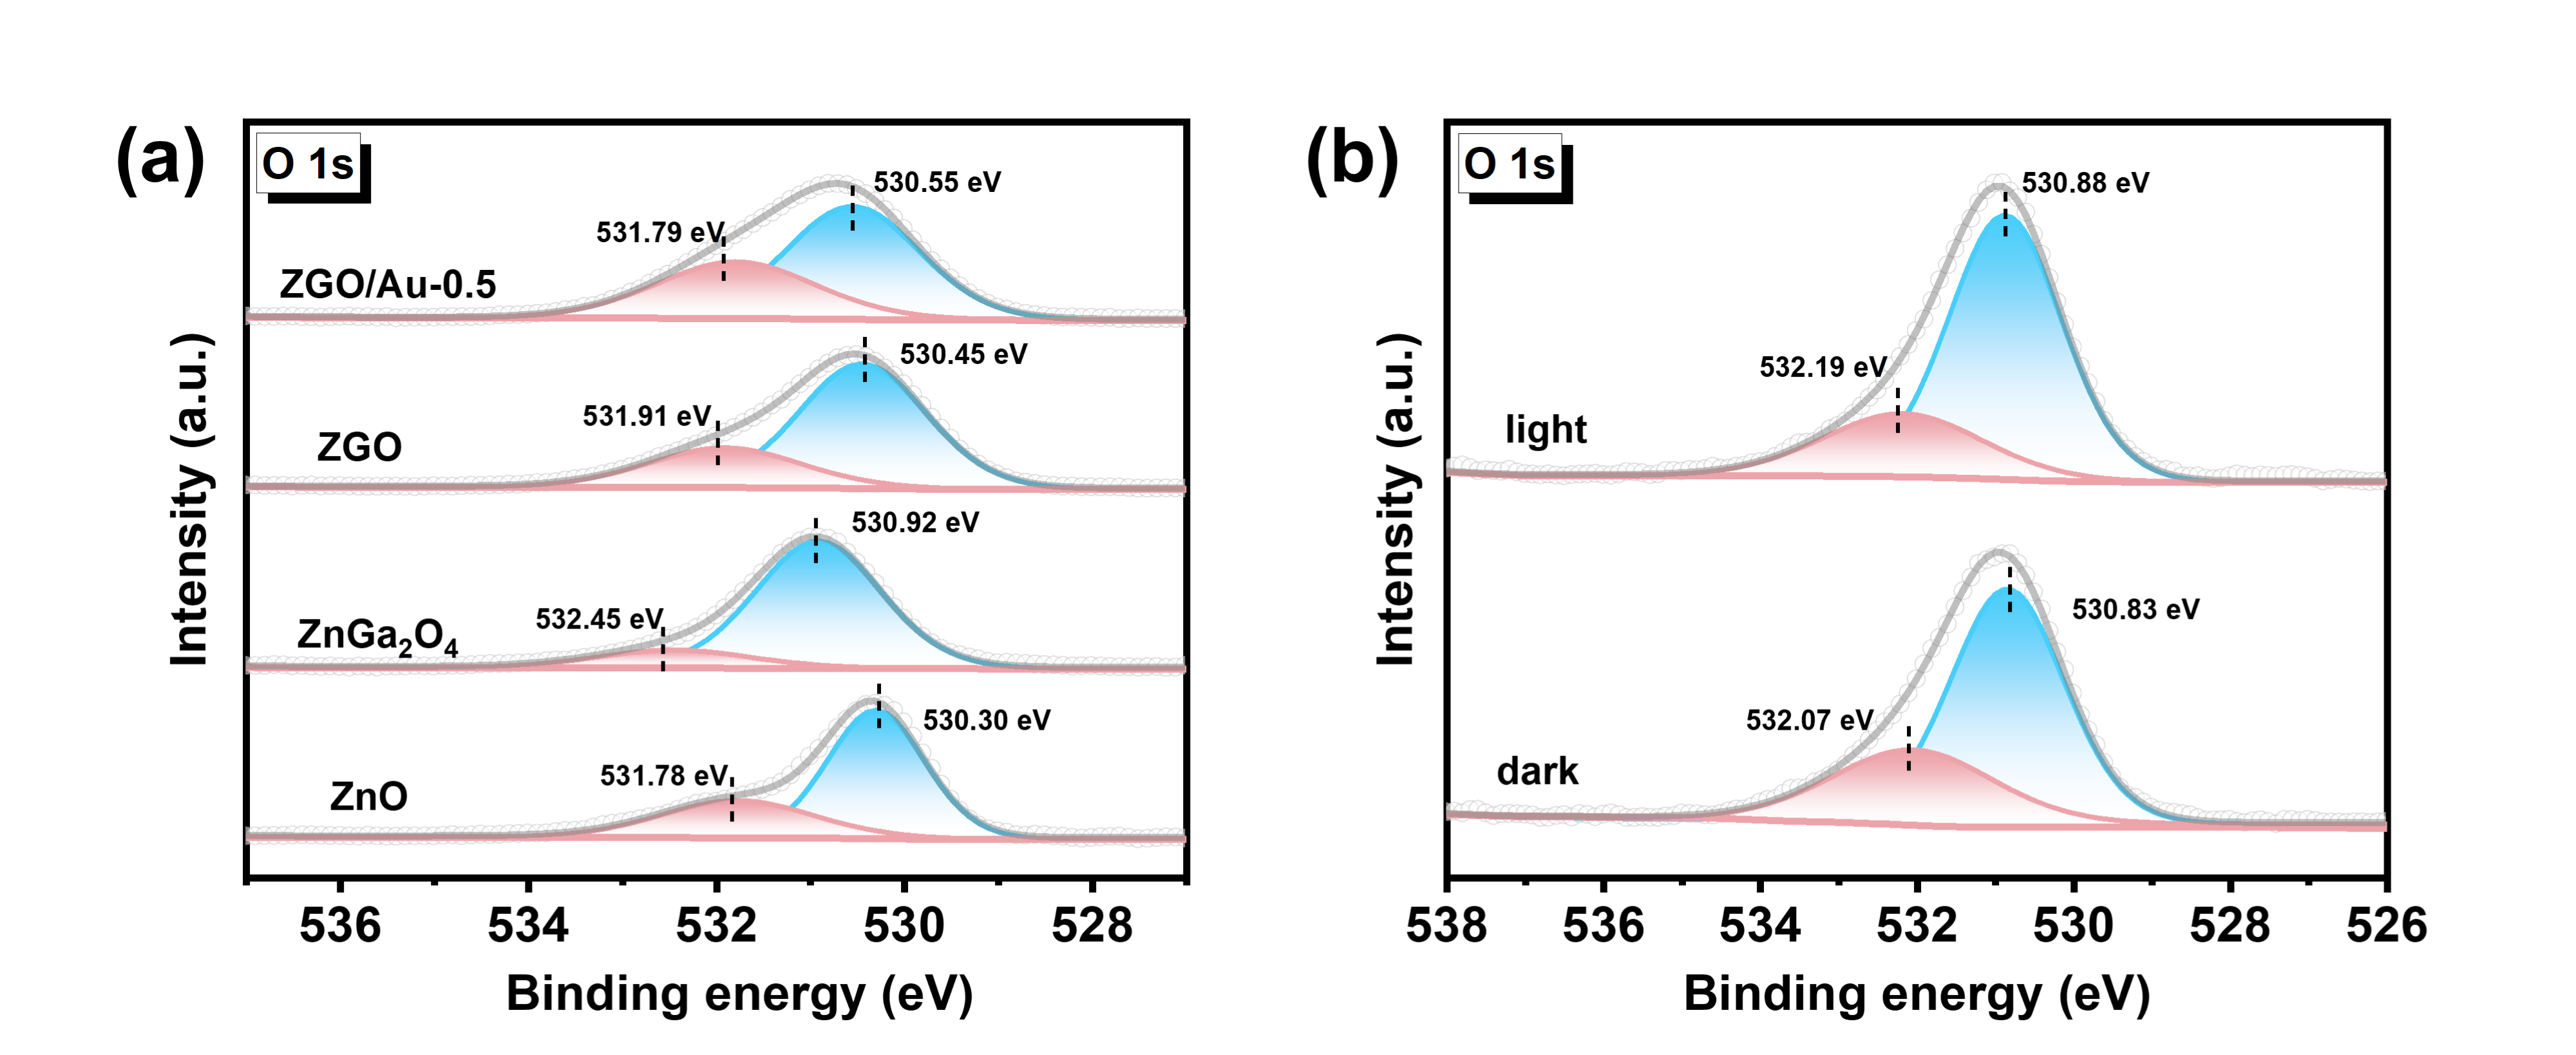


**Figure S7.** XPS survey spectra for O 1s of (a) ZnO, ZnGa2O4, ZGO, and ZGO/Au-0.5 and (b) for ZGO/Au-0.5 under light irradiation.


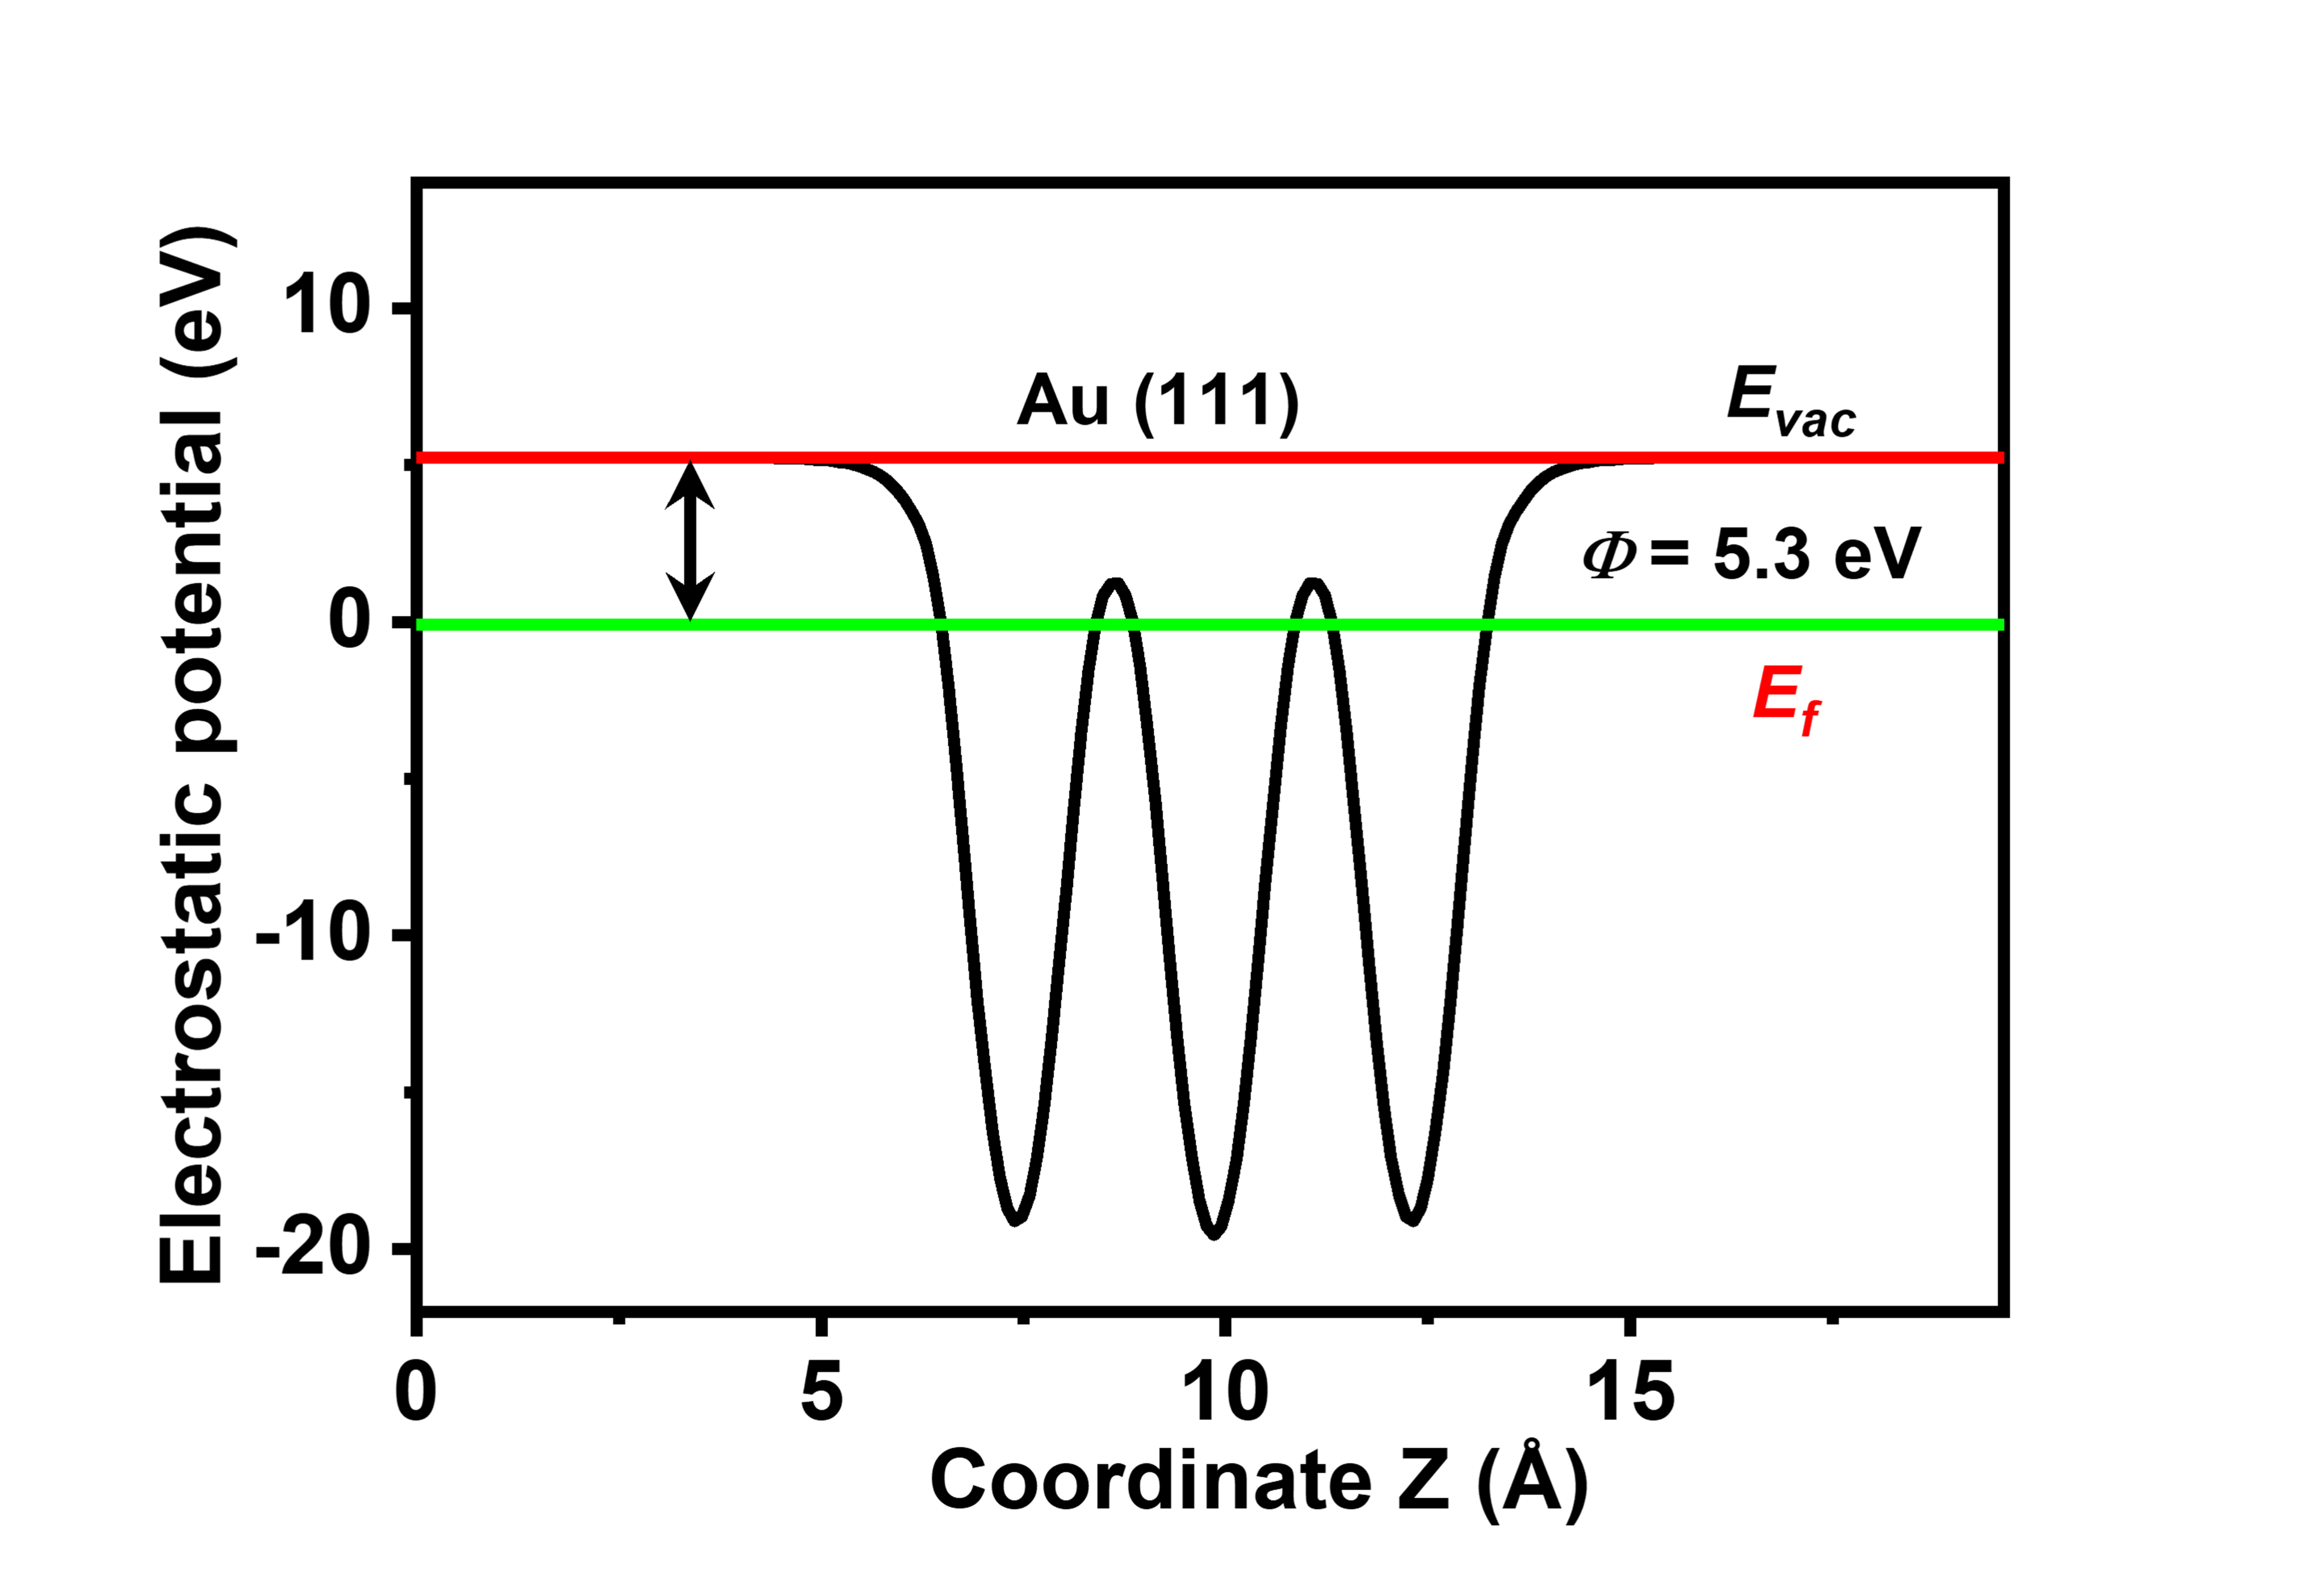


**Figure S8.** Electrostatic potentials of Au (111) surface.

**Table S1.** Comparison of photocatalytic CO2 reduction performance of several similar catalysts that have been reported.

| **Name** | **Photocatalysts** | **CH4 rate (μmol/g/h)** | **CO rate**  **(μmol/g/h)** | **Irradiation** **condition** |
| --- | --- | --- | --- | --- |
| 1[6] | ZnGa2O4-10%Ti3C2-0.7%Fe | 11.81 | 9.72 | 500 W Xe lamp  (UV light) |
| 2[7] | Zn0.725Ge0.15Fe0.15Ga0.70O2.3 | / | 19.3 | 300 W Xe lamp  (full arc) |
| 3[8] | ZnGa2O4 nanocube | 1.3 | / | 300 W UV enhanced Xe lamp  (200~350 nm) |
| 4[9] | 4.5(ZnGa2O4):(Zn2GeO4) | 5 | / | 300 W UV enhanced Xe lamp  (200~350 nm) |
| This work | ZGO/Au-0.5 | 21.1 | 1.4 | 300 W Xe lamp  (full spectrum) |

**Table S2**. BET surface area, pore volume, and average pore diameter of ZGO and ZGO/Au-0.5.

| **Sample** | **Surface area a**  **(m2/g)** | **Pore volume b**  **(cm3/g)** | **Average pore size c**  **(nm)** |
| --- | --- | --- | --- |
| ZGO | 29.25 | 0.269 | 44.43 |
| ZGO/Au-0.5 | 26.69 | 0.201 | 29.74 |

a. The surface area is measured with the Brunauer–Emmett–Teller (BET) method. b. The pore volume is the single-point total pore volume at P/P0 = 0.99. c. The average pore size is calculated using the adsorption branch by Barrett–Joyner–Halenda (BJH) method.

**References**

[1] a) P. E. Blöchl, *Phys. Rev. B* **1994**, 50, 17953; b) G. Kresse, D. Joubert, *Phys. Rev. B* **1999**, 59, 1758.

[2] J. P. Perdew, K. Burke, M. Ernzerhof, *Phys. Rev. Lett.* **1996**, 77, 3865.

[3] S. Grimme, S. Ehrlich, L. Goerigk, *J. Comput. Chem.* **2011**, 32, 1456.

[4] V. Wang, N. Xu, J. C. Liu, G. Tang, W. T. Geng, *Comput. Phys. Commun.* **2021**, 267.

[5] a) J. K. Noerskov, T. Bligaard, A. Logadottir, J. R. Kitchin, J. G. Chen, S. Pandelov, U. Stimming, *ChemInform* **2005**, 36; b) J. K. Nørskov, J. Rossmeisl, A. Logadottir, L. Lindqvist, J. R. Kitchin, T. Bligaard, H. Jónsson, *J. Phys. Chem. B* **2004**, 108, 17886.

[6] Z. Shi, D. Shi, L. Zhang, Y. Cao, *Journal of Power Sources* **2022**, 535.

[7] J. Liang, Y. Chai, L. Li, D. Li, J. Shen, Y. Zhang, X. Wang, *Appl. Catal. B Environ.* **2020**, 265.

[8] S. Yan, J. Wang, H. Gao, N. Wang, H. Yu, Z. Li, Y. Zhou, Z. Zou, *Adv. Funct. Mater.* **2012**, 23, 758.

[9] S. Yan, J. Wang, H. Gao, N. Wang, H. Yu, Z. Li, Y. Zhou, Z. Zou, *Adv. Funct. Mater.* **2012**, 23, 1839.
